# Supplementary material for: Developmental genes targeted for epigenetic variation between twin-twin transfusion syndrome children
Source: PubMed Central journal article supplement (PMC4016001; doi:10.1186/1868-7083-5-18), 2013-10-03
Supplement: 1868-7083-5-18-S1.pdf [file 1868-7083-5-18-S1.pdf]

# Supplementary Figure 1.

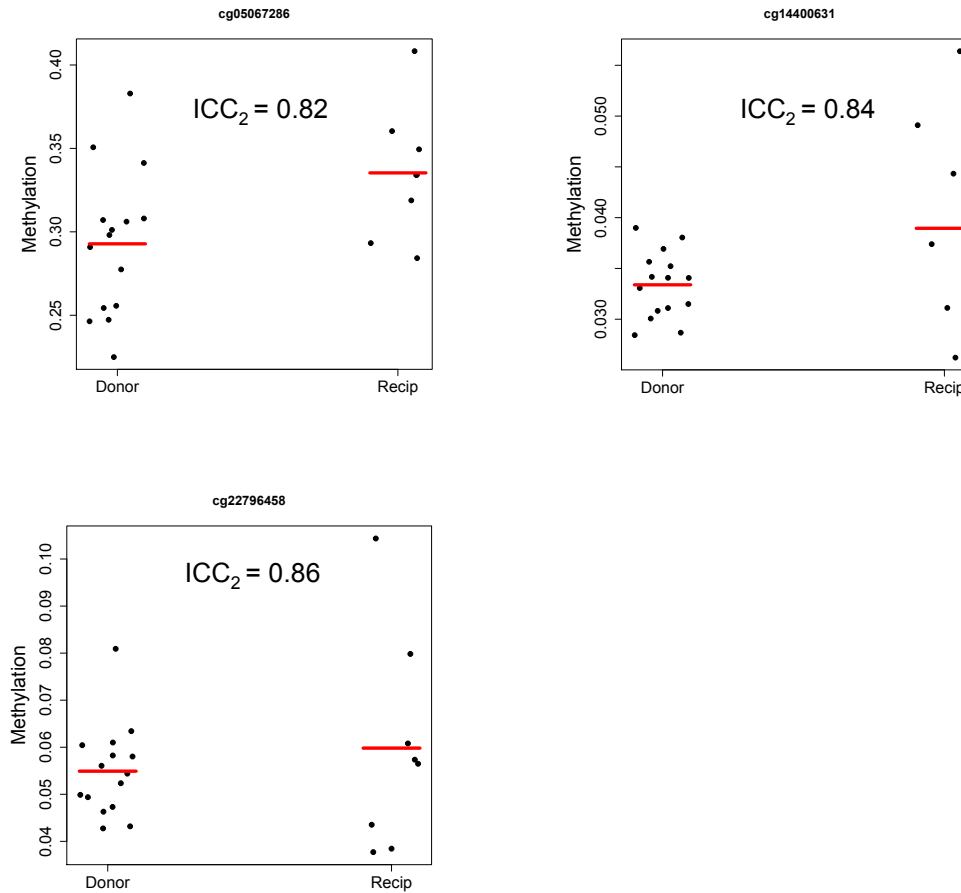

Supplementary Figure 1. Examples of 3 loci demonstrating high donor-recipient interclass correlation values, each suggesting that >80% of their variability is explained by donor-recipient status. Red lines denote the mean methylation within each group.

## Supplementary Figure 2

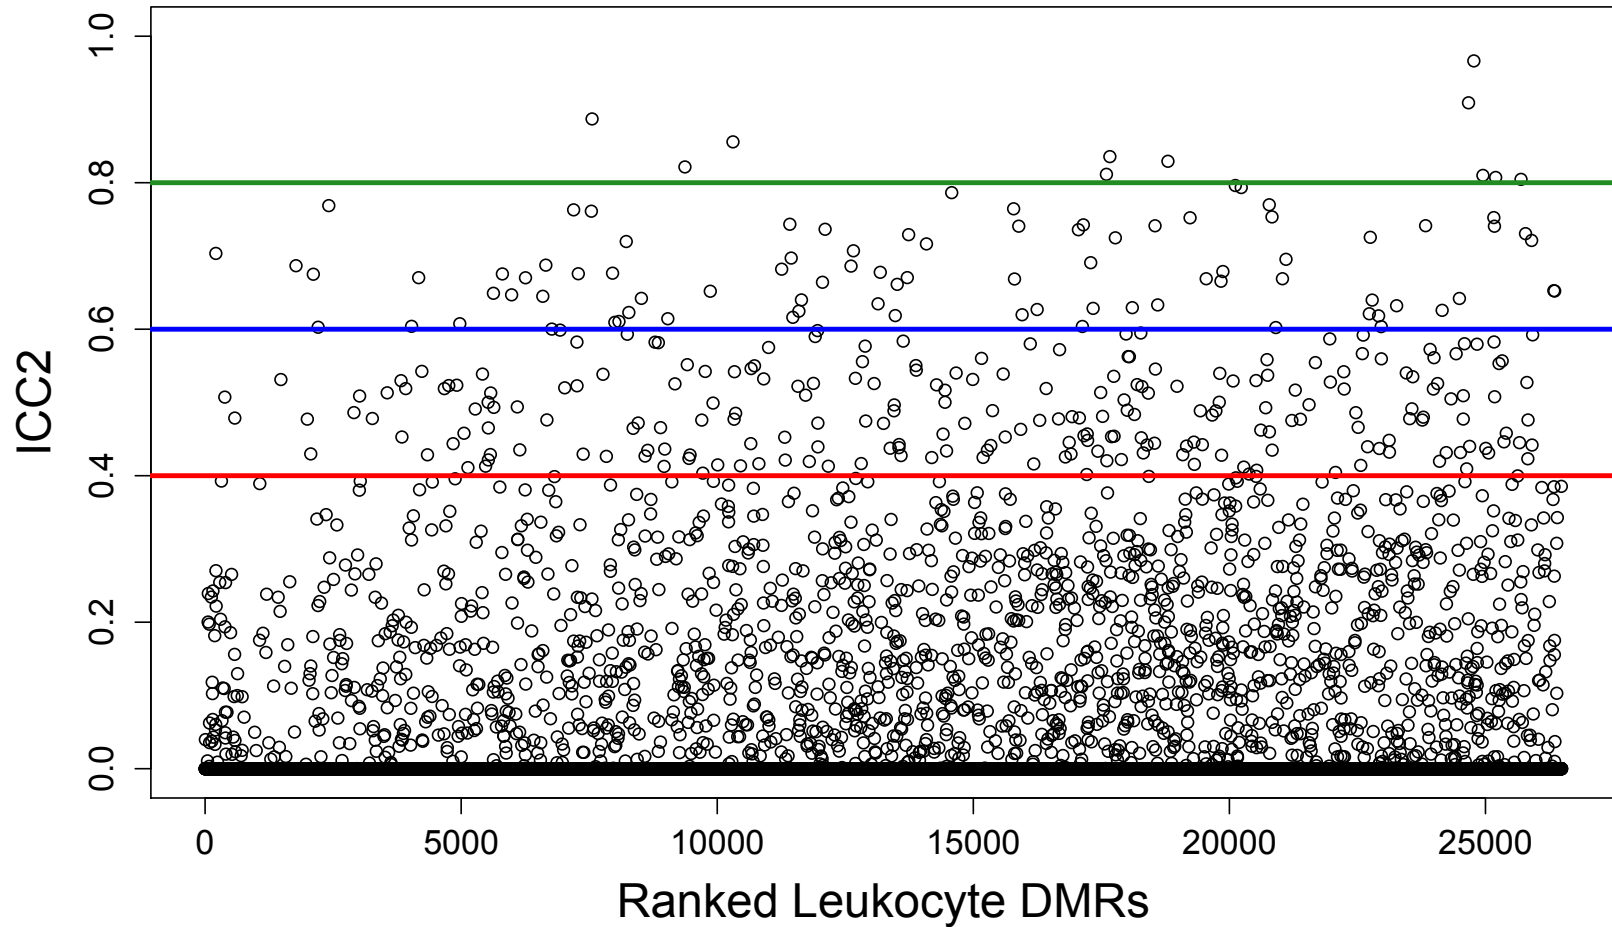

Supplementary Figure 2. Value of the donor-recipient interclass correlation (ICC<sub>2</sub>) values for all loci ranked by their DMR status, based on prior studies of leukocyte subset DNA methylation.
